# Supplementary material for: Sweat and Sebum Preferences of the Human Skin Microbiota
Source: PubMed Central journal article supplement (PMC9927561; doi:10.1128/spectrum.04180-22), 2023-01-05
Supplement: spectrum.04180-22-s0001.pdf [file spectrum.04180-22-s0001.pdf]

**Supplemental Table S1. Basal medium composition.**

| Basal Medium Component           | Composition (mg)                        | Final Concentration |
|----------------------------------|-----------------------------------------|---------------------|
| Salts                            |                                         |                     |
| M9 Salts (g)                     | 11.28 <sup>a</sup> (g)                  | 11.28 g/L           |
| Cobalt Chloride hexahydrate (ug) | 12 <sup>b</sup> (ug)                    | 50 nM               |
| Calcium Chloride anhydrous       | 11 <sup>b</sup>                         | 0.1 mM              |
| Magnesium Sulfate heptahydrate   | 490 <sup>b</sup>                        | 2 mM                |
| Carbon Sources                   |                                         |                     |
| Glucose (g)                      | 0.1 <sup>a</sup> , 1.9 <sup>b</sup> (g) | 2 g/L               |
| Amino Acids                      |                                         |                     |
| L-Arginine                       | 100 <sup>b</sup>                        | 100 mg/L            |
| L-Proline                        | 200 <sup>b</sup>                        | 200 mg/L            |
| Vitamins                         |                                         |                     |
| Thiamine-HCl                     | 2 <sup>b</sup>                          | 2 mg/L              |
| Biotin                           | 2 <sup>b</sup>                          | 2 mg/L              |
| Nicotinic acid                   | 2 <sup>b</sup>                          | 2 mg/L              |
| Calcium pantothenate             | 2 <sup>b</sup>                          | 2 mg/L              |

---

Values are expressed in milligrams (per 1 liter of medium) unless noted otherwise. <sup>a</sup> Added before autoclaving. <sup>b</sup> Added after autoclaving.

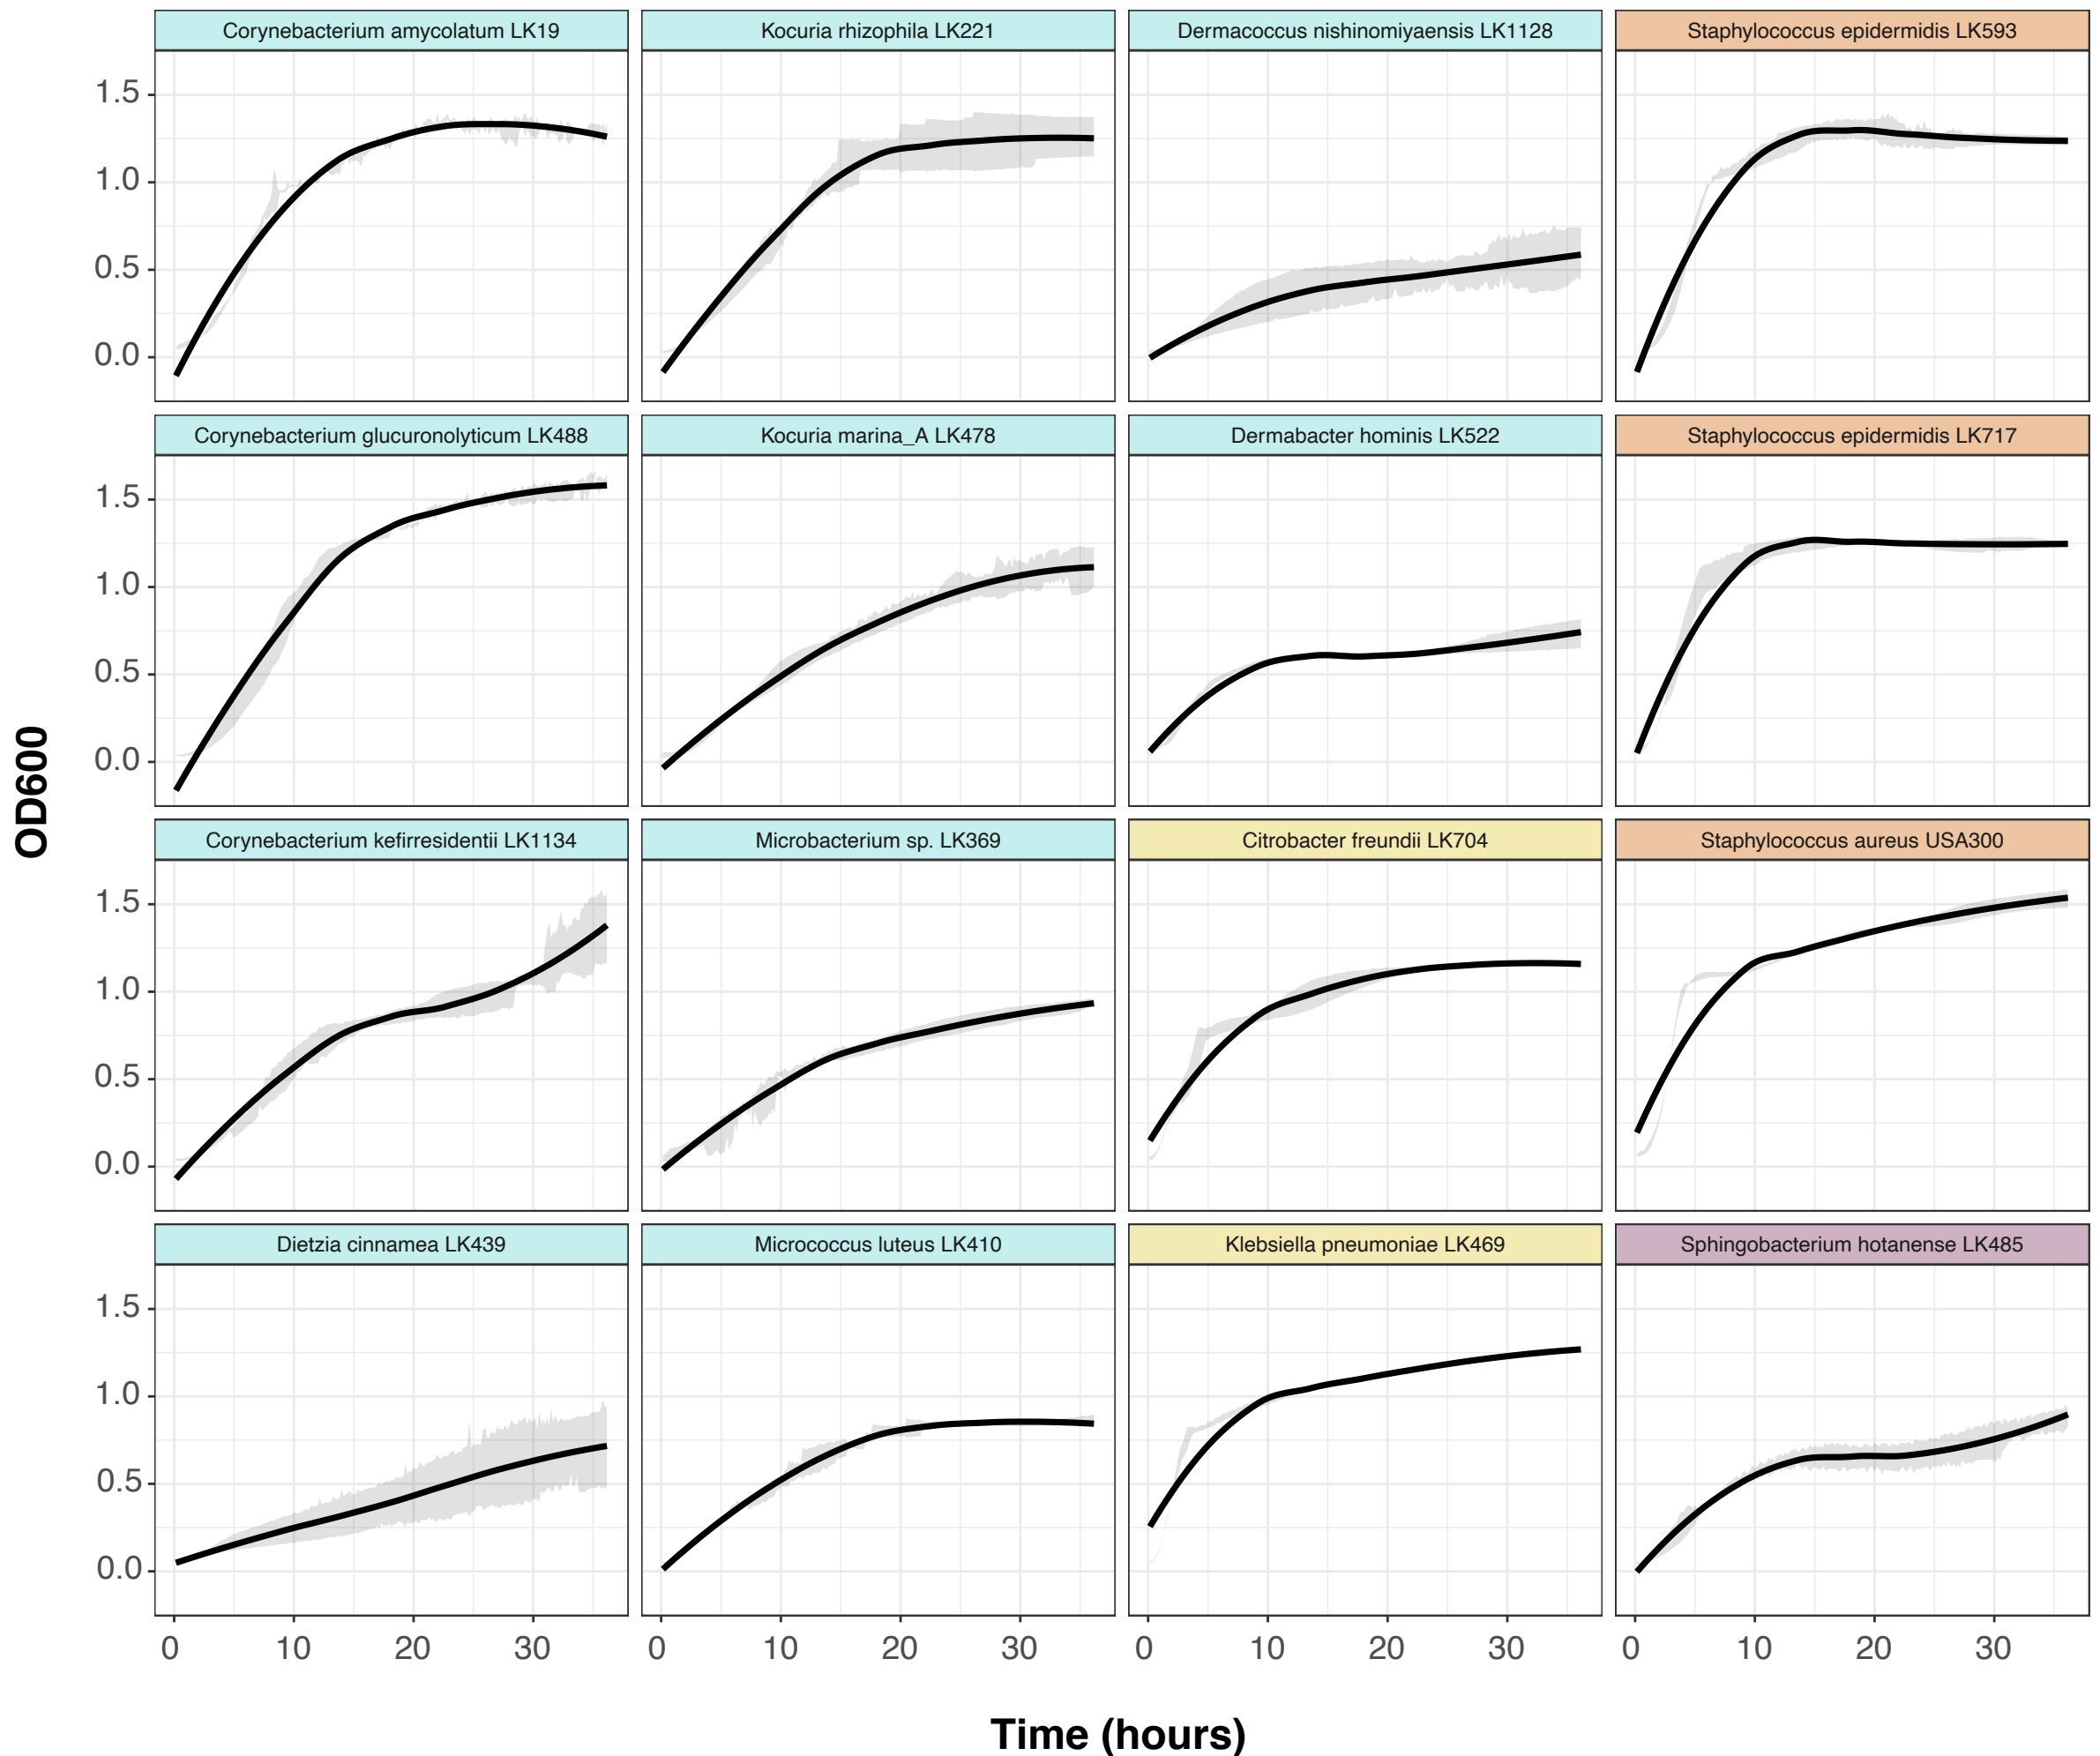

**Supplemental Figure 1.** For each strain, growth curves were collected in Brain Heart Infusion broth supplemented with 0.2% Tween 80 over 36 hours. Strains are ordered by phylum-level taxonomic assignment. Curves were generated using loess smoothing for averaged OD600 values from at least 2 biological replicates with 3 technical replicates each. Ribbons represent the standard deviation across biological replicates.

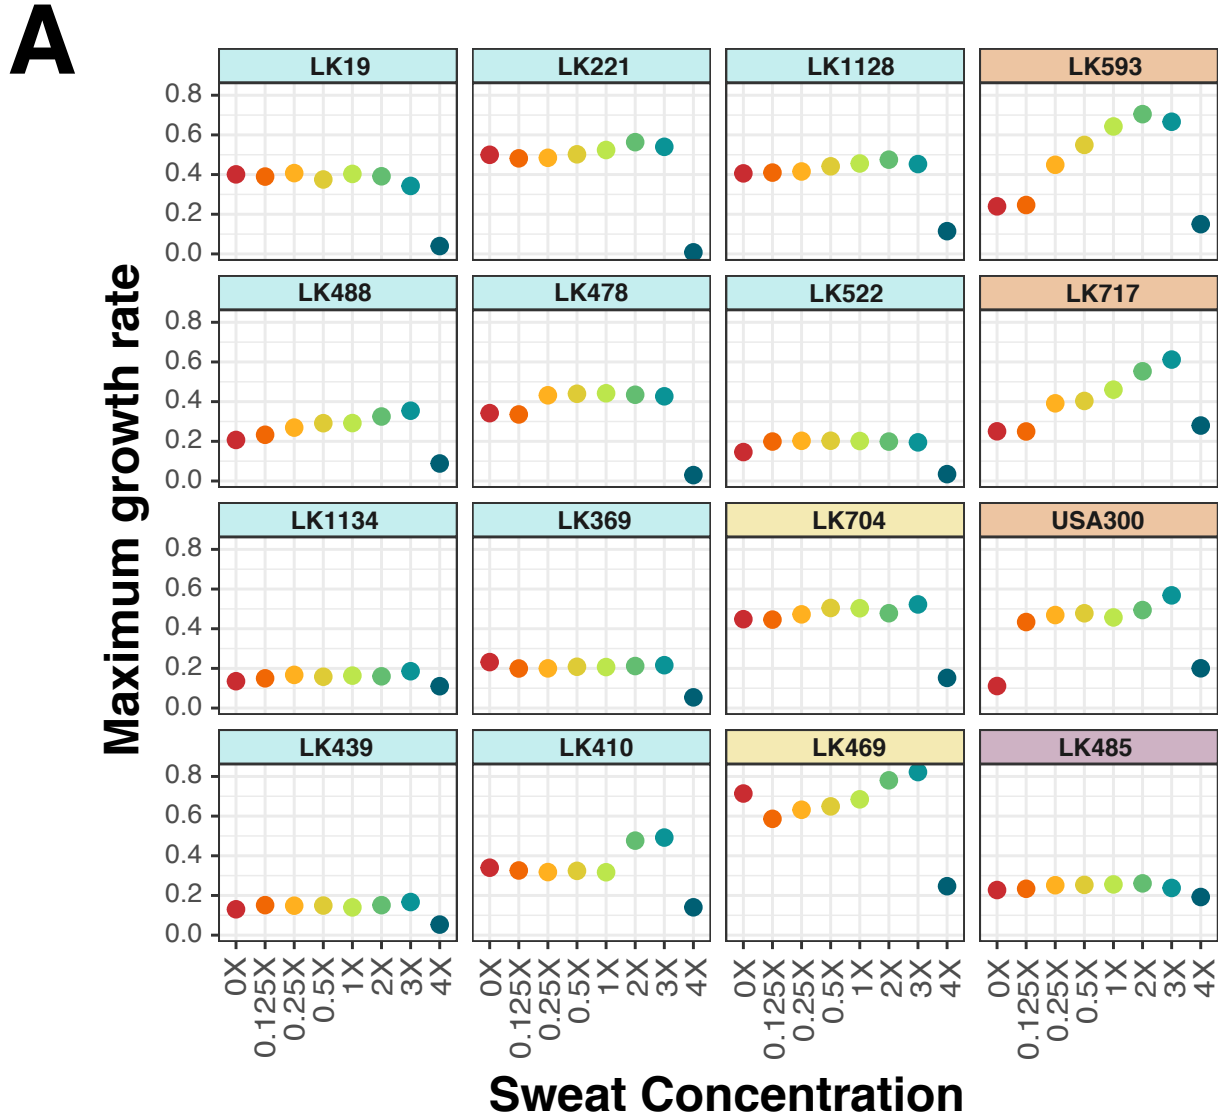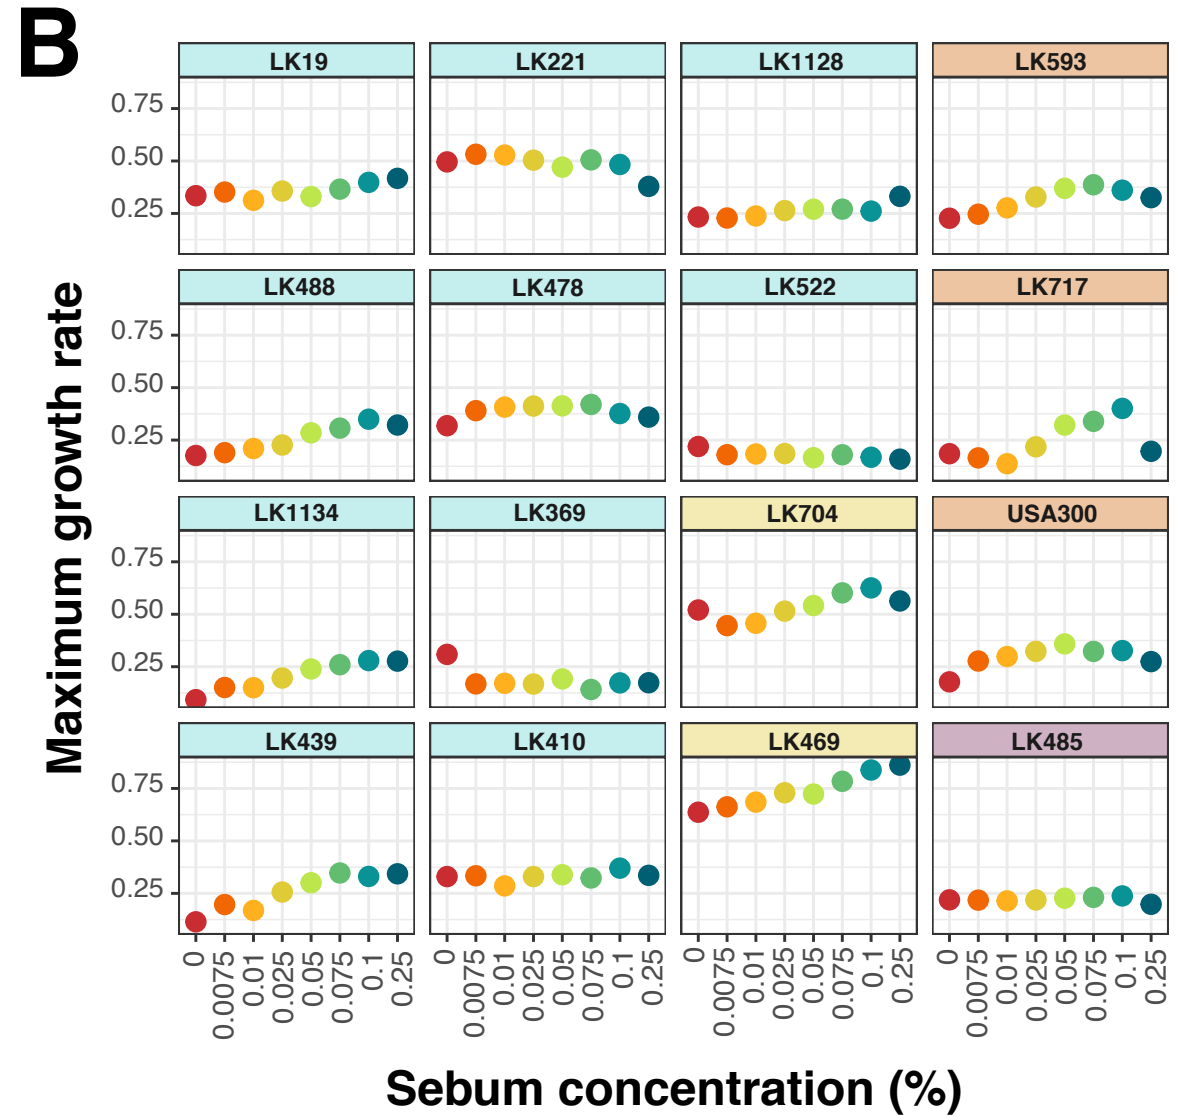

**Supplemental Figure 2.** A) From the artificial sweat growth curve data, maximum growth rate was calculated for each strain and sweat concentration. B) From the artificial sebum growth curve data, maximum growth rate was calculated for each strain and sebum concentration. Strains are ordered as in Figures 2 and 3.

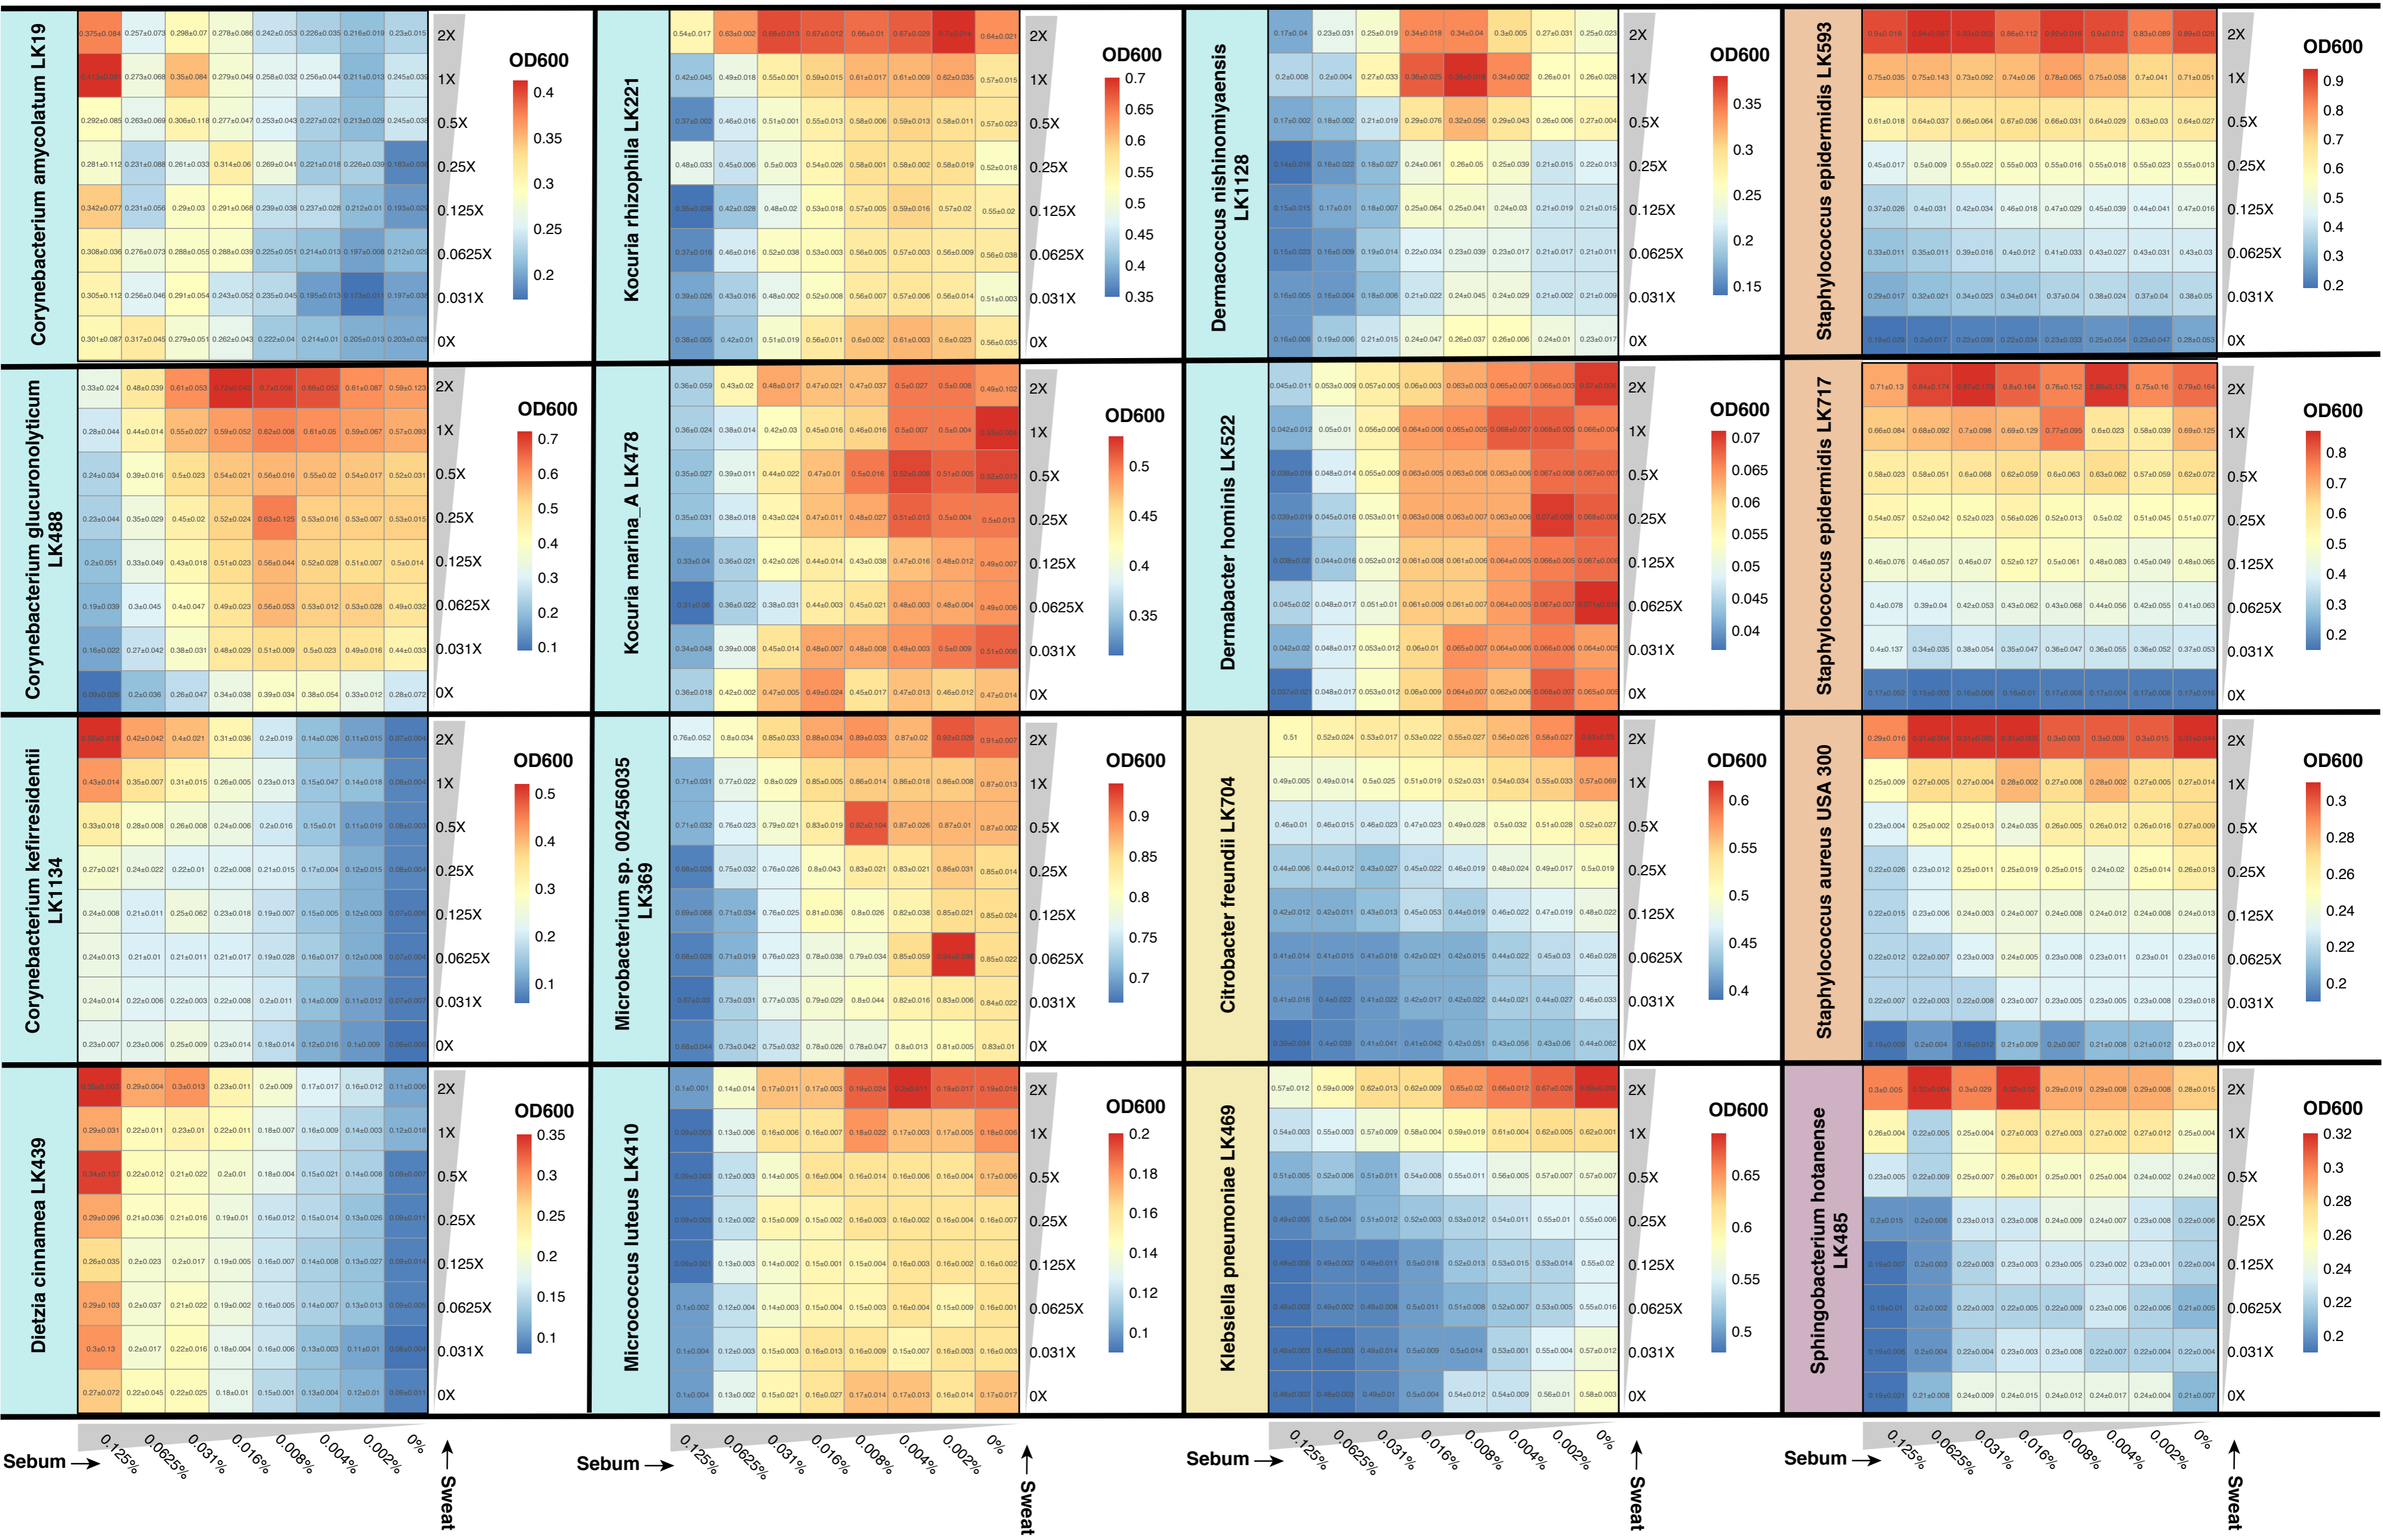

**Phylum**

- Actinomycetota
- Pseudomonadota
- Bacillota
- Bacteroidota

**Supplemental Figure 3.** Strains were cultured in unique combinations of artificial sweat media (0, 0.031, 0.0625, 0.125, 0.25, 0.5, 1, 2X) and artificial sebum media (0, 0.002, 0.004, 0.008, 0.016, 0.031, 0.0625, 0.125%) for 18 hours, after which an endpoint OD600 reading was recorded. At least three replicates were collected for each strain, and OD600 values from uninoculated media were subtracted from experimental OD600 values. Average OD600 values of the replicates and standard deviation are indicated.

Sebum preference

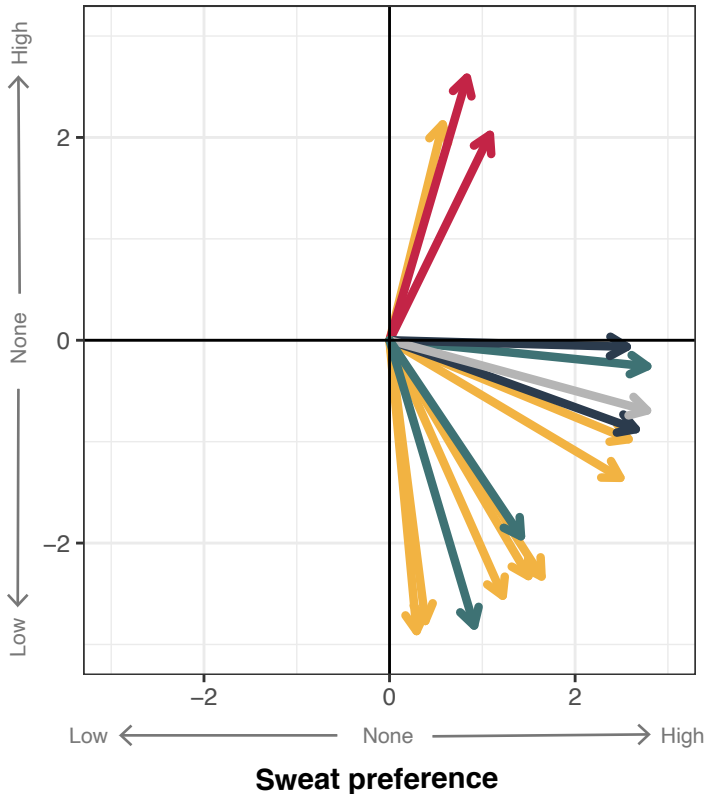

**Supplemental Figure 4.** Multiple linear regression analysis was performed with the z-score normalized data from the sweat and sebum checkerboard assays. The slope coefficients for sweat concentration and sebum concentration are plotted as an (x,y) coordinate, respectively. Strains are colored by skin microenvironment.
